# Supplementary material for: Telemedicine Training in Undergraduate Medical Education: Mixed-Methods Review
Source: PubMed Central journal article supplement (PMC6475822; doi:10.2196/12515), 2019-04-08
Supplement: mededu_v5i1e12515_app1.pdf [file mededu_v5i1e12515_app1.pdf]

| Item Category               | Explanation                                                                                                                                                                                                                                                                                                                                                                                                                                                                                                              |
|-----------------------------|--------------------------------------------------------------------------------------------------------------------------------------------------------------------------------------------------------------------------------------------------------------------------------------------------------------------------------------------------------------------------------------------------------------------------------------------------------------------------------------------------------------------------|
| Design                      | The e-surveys of this study were aimed to collect information from the medical school administrator responsible for telemedicine at medical schools with telemedicine training in their undergraduate medical education                                                                                                                                                                                                                                                                                                  |
| IRB                         | IRB approval was not necessary                                                                                                                                                                                                                                                                                                                                                                                                                                                                                           |
| Development and Pre-testing | The survey was developed using SurveyGizmo based on the themes identified in the literature review. It was pre-tested for functionality by the research team.                                                                                                                                                                                                                                                                                                                                                            |
| Recruitment process         | <p>The data was collected using a linked survey.</p> <p>Initial contact with participants was made through email to each participant's institutional email address. An email was sent explaining the research project and requesting a phone call to interview them or for them to complete the survey form. The email included a link to the survey form.</p> <p>The survey was not otherwise advertised.</p>                                                                                                           |
| Survey administration       | <p>The survey was sent through email and data was entered automatically when participants responded to the survey questions.</p> <p>The survey was voluntary and no incentives were offered.</p> <p>The survey occurred in 2017.</p> <p>There was no randomization of questions or adaptive questions.</p> <p>There were 4 questions in the survey.</p> <p>The survey did not need to be complete for the participant to submit their responses. Participants were able to review their responses before submitting.</p> |
| Response rates              | <p>The response rate was 3 survey responses out of 70 individuals contacted (4%).</p> <p>However, an additional 7 interviews occurred</p>                                                                                                                                                                                                                                                                                                                                                                                |

|                             |                                                                                                                                                                                    |
|-----------------------------|------------------------------------------------------------------------------------------------------------------------------------------------------------------------------------|
|                             | outside of the surveys as a result of the email contact (10%).                                                                                                                     |
| Preventing multiple entries | Participants entered the institution with which they were affiliated to ensure that each institution was not represented in the survey responses more than once.                   |
| Analysis                    | Survey responses were qualitatively analyzed to determine where and how in the undergraduate medical education curriculum telemedicine training was included at their institution. |
